# Supplementary material for: Activation of Glucagon‐Like Peptide‐1 Receptor Ameliorates Cognitive Decline in Type 2 Diabetes Mellitus Through a Metabolism‐Independent Pathway
Source: PubMed Central journal article supplement — J Am Heart Assoc. 2021 Jul 10;10(14):e020734. doi: 10.1161/JAHA.120.020734 (PMC8483500; doi:10.1161/jaha.120.020734), 2021-07-10

# **SUPPLEMENTAL MATERIAL**

**Table S1. Metabolic parameters changes between baseline and 12-week after treatment in both groups.**

|                                          | Control group (n=23) |             |          | GLP-1 group (n=24) |             |          | P value |
|------------------------------------------|----------------------|-------------|----------|--------------------|-------------|----------|---------|
|                                          | 0-week               | 12-week     | P value* | 0-week             | 12-week     | P value† |         |
| <b>Body-mass index —kg/m<sup>2</sup></b> | 24.7 ± 1.8           | 24.8 ± 1.9  | 0.8488   | 28.1 ± 2.2         | 27.2 ± 2.5  | 0.001    | 0.001   |
| <b>Fasting blood glucose — mmol/L</b>    | 8.56 ± 3.33          | 7.24 ± 3.32 | 0.0172   | 9.63 ± 3.50        | 7.93 ± 2.63 | 0.0447   | 0.433   |
| <b>HbA1c — %</b>                         | 8.71 ± 2.14          | 7.69 ± 2.09 | 0.0084   | 9.54 ± 1.99        | 7.44 ± 1.55 | <0.001   | 0.643   |
| <b>Blood pressure — mmHg</b>             |                      |             |          |                    |             |          |         |
| <b>Systolic</b>                          | 128 ± 11             | 125 ± 12    | 0.3816   | 129 ± 11           | 126 ± 10    | 0.3280   | 0.866   |
| <b>Diastolic</b>                         | 80 ± 8               | 78 ± 8      | 0.4011   | 81 ± 8             | 79 ± 8      | 0.3910   | 0.786   |
| <b>TC —mmol/L</b>                        | 5.09 ± 1.49          | 4.59 ± 1.30 | 0.0141   | 4.58 ± 1.35        | 4.42 ± 1.61 | 0.6569   | 0.696   |
| <b>TG —mmol/L</b>                        | 1.75 ± 1.10          | 1.51 ± 0.89 | 0.3250   | 3.14 ± 2.28        | 2.79 ± 2.88 | 0.6112   | 0.049   |
| <b>HDL-c —mmol/L</b>                     | 1.23 ± 0.27          | 1.13 ± 0.23 | 0.0312   | 0.95 ± 0.14        | 1.19 ± 0.34 | 0.0046   | 0.538   |
| <b>LDL-c —mmol/L</b>                     | 2.81 ± 0.95          | 2.59 ± 1.05 | 0.1465   | 2.80 ± 0.87        | 2.73 ± 0.81 | 0.7490   | 0.614   |

Data are mean ± SD. The body-mass index is the weight in kilograms divided by the square of the height in meters. SD = standard deviation; HbA1c=Glycated Hemoglobin;

TC= total cholesterol; TG=triglycerides; HDL-c: high density lipid-cholesterol; LDL-c: low density lipid-cholesterol.

**Table S2. Mean OxyHb concentration during VFT in relevant channels after GLP-1 treatment.**

| <b>channel</b> | <b>Area</b> | <b>0-week</b>             | <b>12-week</b>          | <b>Pvalue</b> |
|----------------|-------------|---------------------------|-------------------------|---------------|
| <b>Ch2</b>     | DLPFC       | -0.0589 [-0.1052, 0.1081] | 0.1852 [0.0426, 0.2771] | 0.0016        |
| <b>Ch8</b>     | DLPFC       | -0.0491 [-0.1619, 0.0416] | 0.1521 [0.0607, 0.2757] | 0.0086        |
| <b>Ch13</b>    | OFC         | -0.0463 [-0.1662, 0.2294] | 0.2248 [0.1136, 0.4036] | 0.0229        |
| <b>Ch17</b>    | DLPFC       | -0.0628 [-0.2092, 0.0844] | 0.1722 [0.0366, 0.3289] | 0.0150        |

Data are median with interquartile range. DLPFC: dorsolateral prefrontal cortex. OFC: orbitofrontal cortex.

**Table S3. Correlations of metabolic parameters and cognitive assessments with the mean OxyHb concentration in significant channels during VFT after liraglutide treatment.**

|                                                       | Ch13                      | Ch15                      |
|-------------------------------------------------------|---------------------------|---------------------------|
| <b>BMI</b>                                            | $r = 0.1859, P = 0.2108$  | $r = 0.1423, P = 0.3399$  |
| <b>Fasting blood glucose</b>                          | $r = 0.1437, P = 0.3354$  | $r = 0.0375, P = 0.8024$  |
| <b>HbA1c</b>                                          | $r = -0.0102, P = 0.9458$ | $r = -0.0190, P = 0.8993$ |
| <b>Blood pressure — mmHg</b>                          |                           |                           |
| <b>Systolic</b>                                       | $r = -0.0715, P = 0.6332$ | $r = 0.0425, P = 0.7765$  |
| <b>Diastolic</b>                                      | $r = 0.0071, P = 0.9622$  | $r = 0.0384, P = 0.7977$  |
| <b>TC</b>                                             | $r = 0.0947, P = 0.5267$  | $r = 0.1207, P = 0.4192$  |
| <b>TG</b>                                             | $r = 0.3987, P = 0.0055$  | $r = 0.4163, P = 0.0036$  |
| <b>HDL-c</b>                                          | $r = 0.2016, P = 0.1741$  | $r = -0.0297, P = 0.8427$ |
| <b>LDL-c</b>                                          | $r = 0.0960, P = 0.5208$  | $r = 0.1118, P = 0.4543$  |
| <b>Digit Span Test (DST)- forwards</b>                | $r = -0.0024, P = 0.9872$ | $r = 0.0333, P = 0.8239$  |
| <b>Digit Span Test (DST)- backwards</b>               | $r = 0.1639, P = 0.2710$  | $r = 0.1742, P = 0.2417$  |
| <b>Total Learning</b>                                 | $r = -0.0200, P = 0.8940$ | $r = 0.1291, P = 0.3869$  |
| <b>Long-Delay Free Recall (LDFR)</b>                  | $r = 0.0738, P = 0.6985$  | $r = 0.4303, P = 0.0176$  |
| <b>Recognition</b>                                    | $r = 0.2608, P = 0.1041$  | $r = 0.2746, P = 0.0864$  |
| <b>Animal Naming Test (ANT)</b>                       | $r = 0.2262, P = 0.1263$  | $r = 0.2438, P = 0.0986$  |
| <b>Clock Drawing Test (CDT)</b>                       | $r = -0.0442, P = 0.7681$ | $r = -0.1494, P = 0.3163$ |
| <b>Trail Making Test (TMT)</b>                        | $r = 0.0346, P = 0.8192$  | $r = -0.1288, P = 0.3934$ |
| <b>Minimum Mental State Examination (MMSE)</b>        | $r = 0.3056, P = 0.0367$  | $r = 0.3120, P = 0.0328$  |
| <b>Memory and executive screening (MES)- Memory</b>   | $r = -0.0308, P = 0.8374$ | $r = 0.0172, P = 0.9089$  |
| <b>Memory and executive screening (MES)-Executive</b> | $r = -0.0610, P = 0.6839$ | $r = -0.0373, P = 0.8036$ |
| <b>Memory and executive screening (MES)-Total</b>     | $r = 0.0384, P = 0.7977$  | $r = 0.0349, P = 0.8159$  |

Figure S1. Experiment design.

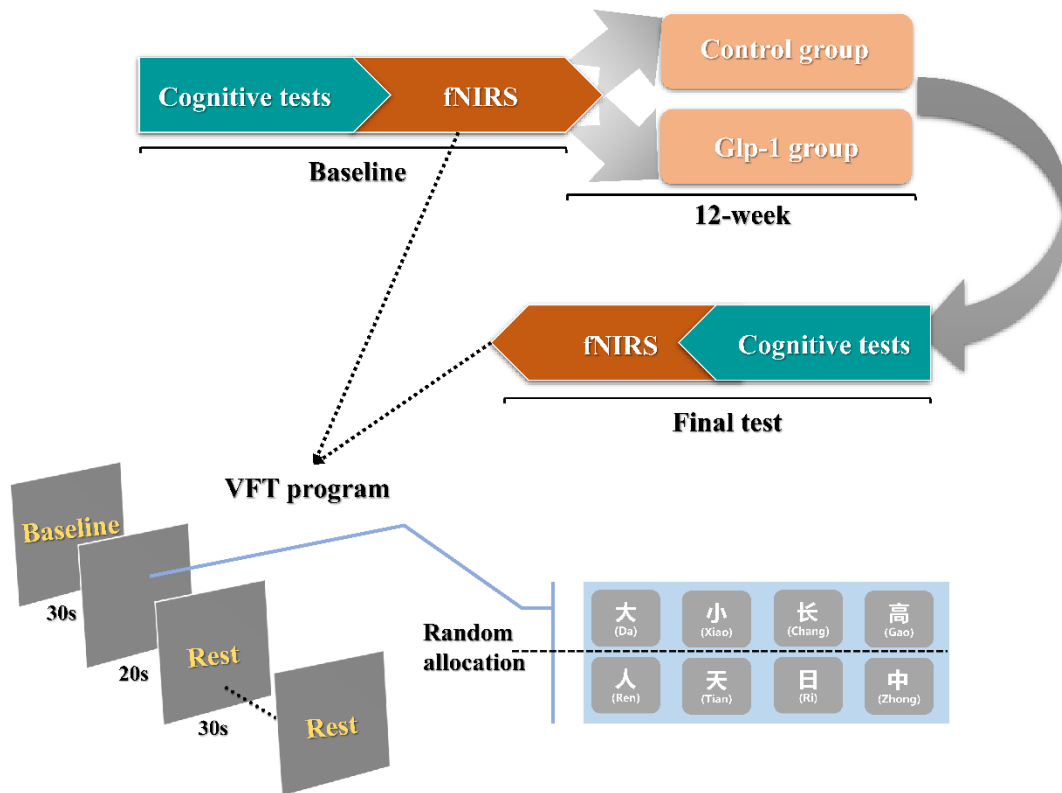

All patients were performed cognitive tests and fNIRS at baseline and at 12 weeks after treatment.

Each block of the VFT consisted of a 30-s pre-task baseline and a 20-s VFT, then followed by a 30-s resting period. The designated word was selected and presented in a random order from the following two groups of four words: “Da,” “Xiao,” “Chang,” “Gao”, or “Ren,” “Tian,” “Ri,” and “Zhong”.

**Figure S2. The configuration of the fNIRS probe array arrangement in the OFC region during the experiment (front view), which consists of 8 emitters (red) and 7 detectors (green) in the arrangement resulted in a total of 20 channels.**

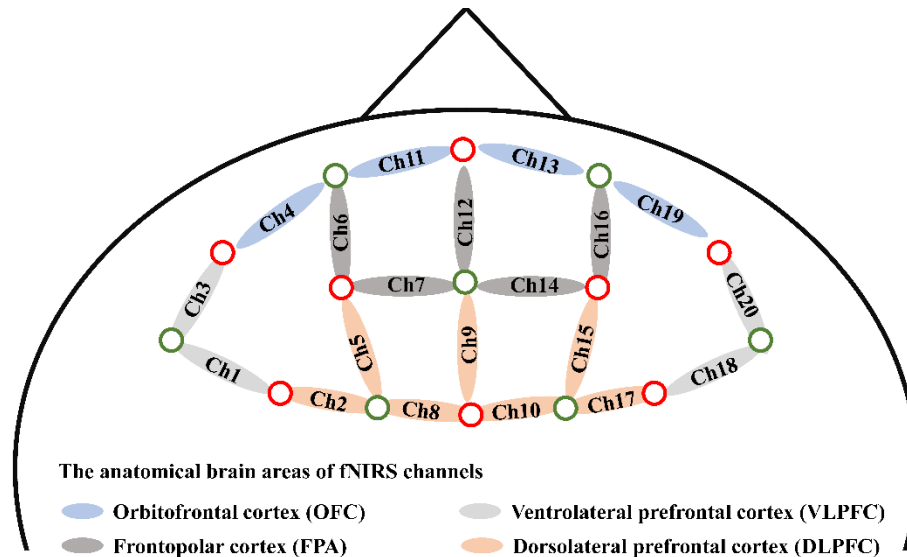

The anatomical brain areas of fNIRS channels were listed as following: orbitofrontal cortex (OFC): channels 4, 11, 13 and 19; ventrolateral prefrontal cortex (VLPFC): channels 1, 3, 18, and 20; dorsolateral prefrontal cortex (DLPFC): channels 2, 5, 8, 9, 10, 15, and 17; and frontopolar cortex (FPA): channels 6, 7, 12, 14, and 16.

Figure S3. Flowchart of participant enrollment and follow-up during 12 weeks.

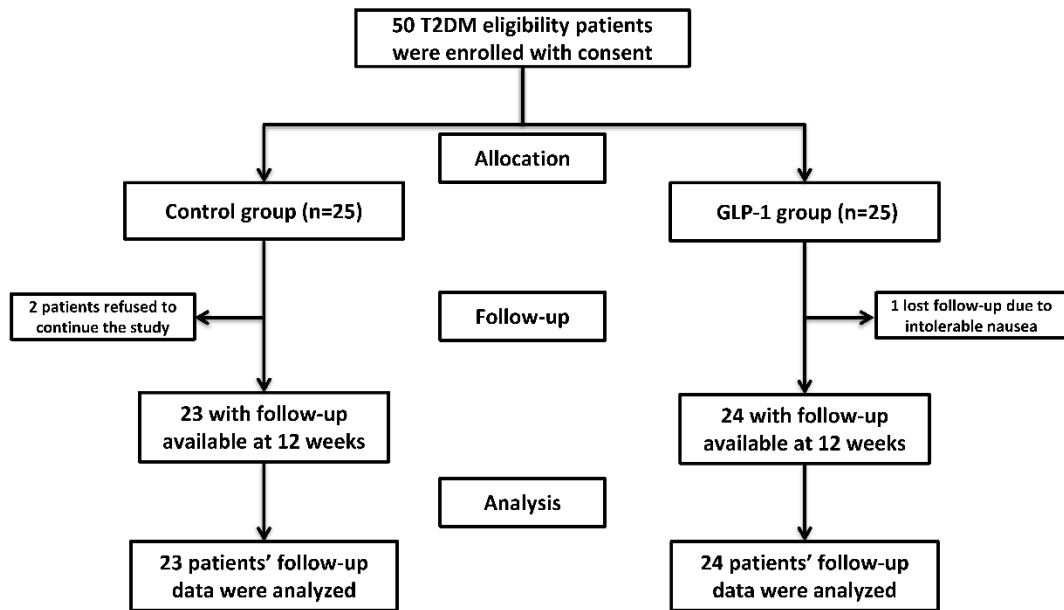

Supplement: JAH3-10-e020734-s001.pdf [file JAH3-10-e020734-s001.pdf]
